# Supplementary material
Source: MDPI journal article supplement (https://www.mdpi.com/2073-4441/15/13/2339)
Supplement: s1 [file s1]

## **SUPPLEMENTALS**

**Table S1.** Sampling Site descriptions and coordinates

| Mississippi Coast<br>town location | Site ID | X       | Y       |
|------------------------------------|---------|---------|---------|
| Pass Christian                     | 1       | 30.3041 | 89.2793 |
| Pass Christian                     | 2       | 30.3151 | 89.2409 |
| Long Beach                         | 3       | 30.3403 | 89.1596 |
| Long Beach                         | 4       | 30.3449 | 89.1471 |
| Gulfport                           | 5       | 30.3758 | 89.0557 |
| Gulfport                           | 6       | 30.3774 | 89.0435 |
| Gulfport                           | 7       | 30.3815 | 89.0262 |
| Biloxi                             | 8       | 30.3894 | 88.9856 |
| Biloxi                             | 9       | 30.393  | 88.9388 |
| Biloxi                             | 10      | 30.3939 | 88.9009 |

**Table S2.** Antibiotics used in this study, their classes, and their clinical significance

| Antibiotic       | Abbreviation | Drug Class       | Clinical Significance                                                                       |
|------------------|--------------|------------------|---------------------------------------------------------------------------------------------|
| Erythromycin     | E15          | Macrolides       | A common broad-spectrum antibiotic that has been in use since the 1950s.                    |
| Tetracycline     | TE30         | Tetracyclines    | A broad-spectrum drug used in the treatment of many bacterial infections.                   |
| Imipenem         | IPM10        | Carbapenems      | A broad-spectrum antibiotic often used against multiresistant strains.                      |
| Cephalothin      | CF30         | Cephalosporin    | Widely used against resistant microorganisms.                                               |
| Ampicillin       | AM10         | Penicillin       | A broad-spectrum drug used against a wide variety of bacteria.                              |
| Sulfamethoxazole | SXT          | Sulfonamide      | Used in treatment of a variety of infections, usually in conjugation with the drug Bactrim. |
| Ciprofloxacin    | CIP5         | Fluoroquinolones | A broad-spectrum drug used against a wide variety of infections.                            |
| Amoxicillin      | AMC30        | $\beta$ -Lactam  | Prescribed in high levels to treat bacterial infections.                                    |

**Table S3.** Number of *E. coli* isolates expressing resistance to antibiotics, by sampling month. Percentages are shown in parentheses. Antibiotic disc IDs are as follows: Erythromycin (E15), Amoxicillin (AMC30), Sulfamethoxazole (SXT), Cephalothin (CF30), Imipenem (IPM10), Tetracycline (TE30), Ciprofloxacin (CIP15), Ampicillin (AM10).

| Sampling months | Total <i>E. coli</i> | E15        | AMC30      | SXT       | CF30       | IPM10      | TE30       | CIP5      | AM10       |
|-----------------|----------------------|------------|------------|-----------|------------|------------|------------|-----------|------------|
| Sep-20          | 44                   | 44 (100%)  | 19 (43.2%) | 3 (6.8%)  | 43 (97.7%) | 4 (9.1%)   | 14 (31.8%) | 3 (6.8%)  | 35 (79.5%) |
| Oct-20          | 39                   | 39 (100%)  | 19 (48.7%) | 1 (2.6%)  | 36 (92.3%) | 2 (5.1%)   | 19 (48.7%) | 1 (2.6%)  | 32 (82.2%) |
| Nov-20          | 11                   | 11 (100%)  | 4 (36.4%)  | 1 (9.1%)  | 8 (72.7%)  | 0 (0%)     | 1 (9.1%)   | 1 (9.1%)  | 5 (45.5%)  |
| Dec-20          | 41                   | 31 (76.5%) | 10 (24.4%) | 2 (4.9%)  | 22 (53.7%) | 1 (2.4%)   | 2 (4.9%)   | 0 (0%)    | 14 (34.1%) |
| Jan-21          | 14                   | 13 (92.9%) | 0 (0%)     | 1 (7.1%)  | 12 (85.7%) | 0 (0%)     | 0 (0%)     | 0 (0%)    | 4 (28.6%)  |
| Mar-21          | 44                   | 44 (100%)  | 5 (11.4%)  | 3 (6.8%)  | 44 (100%)  | 0 (0%)     | 7 (15.9%)  | 2 (4.5%)  | 19 (43.2%) |
| Apr-21          | 50                   | 50 (100%)  | 17 (34%)   | 1 (2%)    | 47 (94%)   | 0 (0%)     | 14 (28%)   | 2 (4%)    | 25 (50%)   |
| May-21          | 49                   | 49 (100%)  | 24 (49%)   | 3 (6.1%)  | 48 (98%)   | 1 (2%)     | 21 (42.9%) | 8 (16.3%) | 28 (57.1%) |
| Jun-21          | 41                   | 41 (100%)  | 20 (48.8%) | 7 (17.1%) | 40 (97.6%) | 1 (2.4%)   | 13 (31.7%) | 6 (14.6%) | 27 (65.9%) |
| Jul-21          | 47                   | 38 (80.9%) | 25 (53.2%) | 3 (6.4%)  | 17 (36.2%) | 30 (63.8%) | 6 (12.8%)  | 5 (10.6%) | 27 (57.4%) |
| Mean            |                      | 94.9%      | 34.9%      | 6.9%      | 82.8%      | 8.5%       | 22.6%      | 6.9%      | 54.3%      |

**Table S4.** Number of *E. coli* isolates expressing resistance to antibiotics, by sampling site across all sampling events. Percentages are shown in parentheses. Antibiotic disc IDs are as follows: Erythromycin (E15), Amoxicillin (AMC30), Sulfamethoxazole (SXT), Cephalothin (CF30), Imipenem (IPM10), Tetracycline (TE30), Ciprofloxacin (CIP15), Ampicillin (AM10).

| Antibiotics<br>(disc IDs) | S1            | S2            | S3            | S4            | S5            | S6            | S7            | S8            | S9            | S10           |
|---------------------------|---------------|---------------|---------------|---------------|---------------|---------------|---------------|---------------|---------------|---------------|
| Erythromycin<br>(E15)     | 36<br>(97.3%) | 35<br>(100%)  | 41<br>(100%)  | 43<br>(93.5%) | 28<br>(84.8%) | 37<br>(92.5%) | 32<br>(97%)   | 36<br>(87.8%) | 33<br>(97.1%) | 39<br>(97.5%) |
| Amoxicillin<br>(AMC30)    | 16<br>(43.3%) | 14<br>(40%)   | 15<br>(36.6%) | 18<br>(39.1%) | 20<br>(60.6%) | 12<br>(35%)   | 15<br>(45.5%) | 13<br>(31.7%) | 9<br>(26.5%)  | 9<br>(22.5%)  |
| Sulfamethoxazole<br>(SXT) | 1<br>(2.7%)   | 4<br>(11.4%)  | 4<br>(9.8%)   | 2<br>(4.3%)   | 3<br>(9.1%)   | 2<br>(5%)     | 3<br>(9%)     | 0<br>(0%)     | 2<br>(5.9%)   | 4<br>(10%)    |
| Cephalothin<br>(CF30)     | 34<br>(91.9%) | 30<br>(85.7%) | 33<br>(80.5%) | 40<br>(87%)   | 24<br>(72.7%) | 33<br>(82.5%) | 29<br>(87.9%) | 32<br>(78%)   | 28<br>(82.4%) | 34<br>(85%)   |
| Imipenem<br>(IPM10)       | 0<br>(0%)     | 4<br>(11.4%)  | 5<br>(12.2%)  | 3<br>(6.5%)   | 6<br>(18.2%)  | 5<br>(12.5%)  | 4<br>(12.1%)  | 4<br>(9.8%)   | 4<br>(11.8%)  | 4 (10%)       |
| Tetracycline<br>(TE30)    | 11<br>(29.7%) | 8<br>(22.9%)  | 15<br>(36.6%) | 10<br>(21.7%) | 7<br>(21.2%)  | 6<br>(15%)    | 14<br>(42.4%) | 6<br>(14.6%)  | 9<br>(26.5%)  | 1<br>(27.5%)  |
| Ciprofloxacin<br>(CIP5)   | 3<br>(8.1%)   | 5<br>(14.3%)  | 5<br>(12.2%)  | 1<br>(2.2%)   | 2<br>(6.1%)   | 1<br>(2.5%)   | 4<br>(12.1%)  | 1<br>(2.4%)   | 1<br>(2.9%)   | 5<br>(12.5%)  |
| Ampicillin<br>(AM10)      | 20<br>(54.1%) | 19<br>(54.3%) | 27<br>(65.9%) | 22<br>(47.8%) | 23<br>(69.7%) | 20<br>(50%)   | 20<br>(60.6%) | 25<br>(61%)   | 18<br>(52.9%) | 22<br>(55%)   |

**Table S5.** Number of **Enterococcus** isolates expressing resistance to antibiotics, by sampling month. Percentages are shown in parentheses.

Antibiotic disc IDs are as follows: Erythromycin (E15), Amoxicillin (AMC30), Sulfamethoxazole (SXT), Cephalothin (CF30), Imipenem (IPM10), Tetracycline (TE30), Ciprofloxacin (CIP15), Ampicillin (AM10).

| Sampling months | Total Enterococcus | E15           | AMC30         | SXT           | CF30          | IPM10        | TE30          | CIP5          | AM10         |
|-----------------|--------------------|---------------|---------------|---------------|---------------|--------------|---------------|---------------|--------------|
| Sep-20          | 19                 | 15<br>(78.9%) | 0<br>(0%)     | 13<br>(68.4%) | 6<br>(31.6%)  | 1<br>(5.3%)  | 4<br>(21.1%)  | 11<br>(57.9%) | 0<br>(0%)    |
| Oct-20          | 19                 | 11<br>(57.9%) | 0<br>(0%)     | 0<br>(0%)     | 12<br>(63.1%) | 1<br>(5.3%)  | 3<br>(15.8%)  | 15<br>(78.9%) | 0<br>(0%)    |
| Nov-20          | 4                  | 2<br>(50%)    | 0<br>(0%)     | 2<br>(50%)    | 2<br>(50%)    | 0<br>(0%)    | 1<br>(25%)    | 3<br>(75%)    | 0<br>(0%)    |
| Dec-20          | 23                 | 15<br>(65.2%) | 1<br>(4.3%)   | 6<br>(26.1%)  | 7<br>(30.4%)  | 0<br>(0%)    | 7<br>(30.4%)  | 20<br>(87%)   | 2<br>(8.7%)  |
| Jan-21          | 3                  | 3<br>(100%)   | 0<br>(0%)     | 0<br>(0%)     | 3<br>(100%)   | 0<br>(0%)    | 1<br>(33.3%)  | 2<br>(66.6%)  | 0<br>(0%)    |
| Mar-21          | 42                 | 31<br>(73.8%) | 3<br>(7.1%)   | 6<br>(14.3%)  | 17<br>(40.5%) | 0<br>(0%)    | 19<br>(45.2%) | 31<br>(73.8%) | 2<br>(4.8%)  |
| Apr-21          | 38                 | 30<br>(78.9%) | 2<br>(5.3%)   | 18<br>(47.4%) | 29<br>(76.3%) | 0<br>(0%)    | 15<br>(39.5%) | 30<br>(78.9%) | 4<br>(10.5%) |
| May-21          | 46                 | 33<br>(71.7%) | 8<br>(17.4%)  | 29<br>(63%)   | 37<br>(80.4%) | 0<br>(0%)    | 32<br>(69.6%) | 35<br>(76.1%) | 8<br>(17.4%) |
| Jun-21          | 32                 | 30<br>(93.8%) | 10<br>(31.3%) | 15<br>(46.9%) | 30<br>(93.8%) | 4<br>(12.5%) | 21<br>(65.6%) | 26<br>(81.3%) | 9<br>(28.1%) |
| Jul-21          | 40                 | 32<br>(80%)   | 5<br>(12.5%)  | 6<br>(15%)    | 19<br>(47.5%) | 1<br>(2.5%)  | 16<br>(40%)   | 33<br>(82.5%) | 2<br>(5%)    |
| Mean            |                    | 75%           | 7.8%          | 33%           | 61.4%         | 2.6%         | 38.6%         | 75.8%         | 7.5%         |

**Table S6.** Number of **Enterococcus** isolates expressing resistance to antibiotics, by sampling site. Percentages are shown in parentheses.

Antibiotic disc IDs are as follows: Erythromycin (E15), Amoxicillin (AMC30), Sulfamethoxazole (SXT), Cephalothin (CF30), Imipenem (IPM10), Tetracycline (TE30), Ciprofloxacin (CIP15), Ampicillin (AM10).

| Antibiotics (disc IDs) | S1            | S2          | S3            | S4            | S5          | S6            | S7            | S8            | S9            | S10         |
|------------------------|---------------|-------------|---------------|---------------|-------------|---------------|---------------|---------------|---------------|-------------|
| Erythromycin (E15)     | 24<br>(66.7%) | 15<br>(60%) | 22<br>(71%)   | 28<br>(77.8%) | 18<br>(72%) | 18<br>(75%)   | 16<br>(94%)   | 19<br>(90.5%) | 18<br>(88.5%) | 19<br>(76%) |
| Amoxicillin (AMC30)    | 1<br>(2.8%)   | 1<br>(4%)   | 5<br>(12.9%)  | 6<br>(16.7%)  | 4<br>(16%)  | 1<br>(4.2%)   | 0<br>(0%)     | 9<br>(9.5%)   | 6<br>(23.1%)  | 4<br>(16%)  |
| Sulfamethoxazole (SXT) | 3<br>(8.3%)   | 7<br>(28%)  | 18<br>(58.1%) | 10<br>(27.8%) | 7<br>(28%)  | 5<br>(20.8%)  | 7<br>(41.2%)  | 10<br>(47.6%) | 13<br>(53.8%) | 14<br>(56%) |
| Cephalothin (CF30)     | 23<br>(63.9%) | 14<br>(56%) | 17<br>(58.1%) | 26<br>(72.2%) | 11<br>(44%) | 17<br>(70.8%) | 7<br>(41.2%)  | 8<br>(57.1%)  | 18<br>(69.2%) | 16<br>(64%) |
| Imipenem (IPM10)       | 0<br>(0%)     | 0<br>(0%)   | 3<br>(9.7%)   | 2<br>(5.6%)   | 0<br>(0%)   | 1<br>(4.2%)   | 0<br>(0%)     | 0<br>(0%)     | 1<br>(3.8%)   | 0<br>(0%)   |
| Tetracycline (TE30)    | 14<br>(38.9%) | 16<br>(60%) | 16<br>(51.6%) | 20<br>(55.6%) | 12<br>(48%) | 7<br>(25%)    | 5<br>(29.4%)  | 9<br>(42.9%)  | 13<br>(50%)   | 9<br>(36%)  |
| Ciprofloxacin (CIP5)   | 33<br>(91.7)  | 18<br>(72%) | 22<br>(71%)   | 24<br>(66.7%) | 18<br>(72%) | 23<br>(95.8%) | 14<br>(82.4%) | 17<br>(81%)   | 21<br>(80.8%) | 16<br>(64%) |
| Ampicillin (AM10)      | 3<br>(8.3%)   | 2<br>(8%)   | 4<br>(12.9%)  | 3<br>(8.3%)   | 1<br>(4%)   | 2<br>(8.3%)   | 0<br>(0%)     | 17<br>(14.3%) | 7<br>(26.9%)  | 2<br>(8%)   |
